# Supplementary material for: A method for measuring the distribution of the shortest telomeres in cells and tissues
Source: PubMed Central journal article supplement (PMC5676791; doi:10.1038/s41467-017-01291-z), 2017-11-07
Supplement: 41467_2017_1291_MOESM1_ESM.pdf [file 41467_2017_1291_MOESM1_ESM.pdf]

**a**

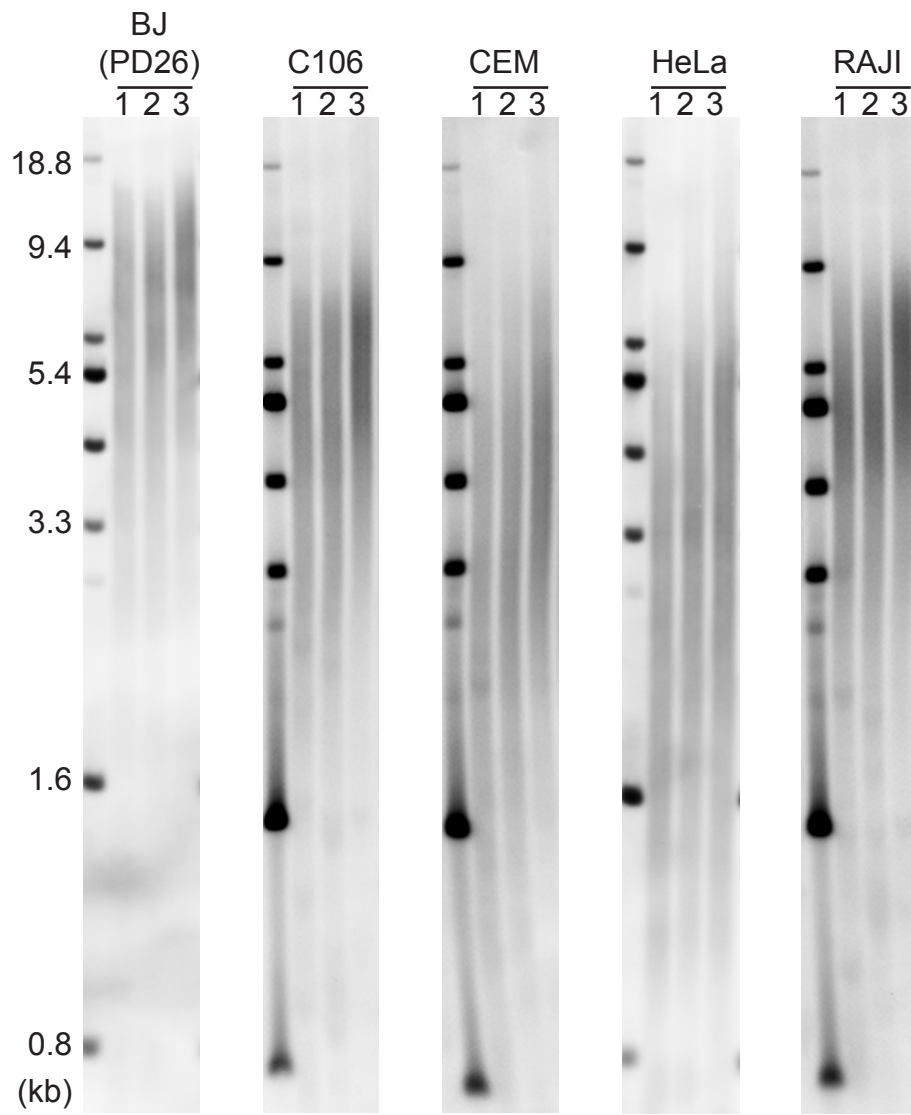

**b**

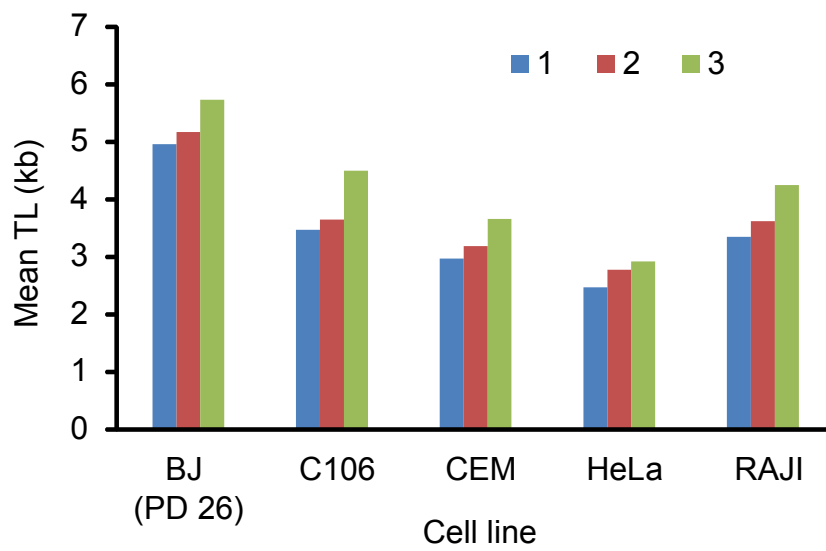

**Supplementary Figure 1. TRF analysis using different combinations of restriction enzymes.**

(a) DNA of BJ, C106, CEM, HeLA, and RAJI cells were digested with 1, Bfal/CviAII/Msel/Ndel; 2, HphI/MnII; 3, AluI/HaeIII/HhaI/HinfI/MspI/RsaI. (b) Quantification results of each cell line's TRF analysis in (a).

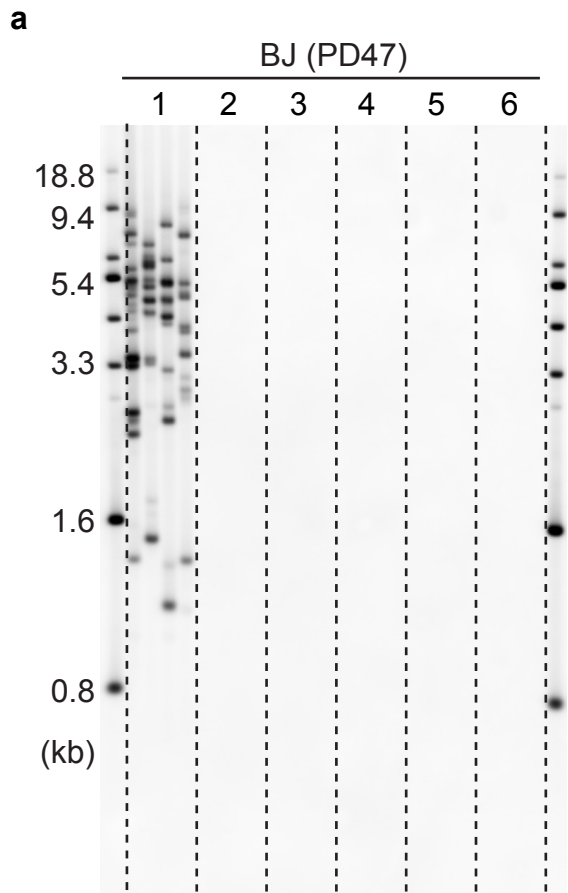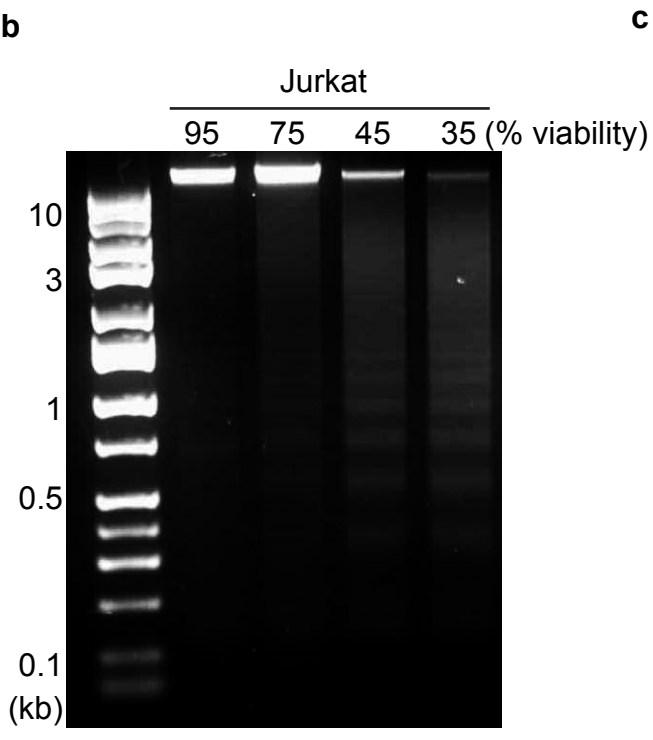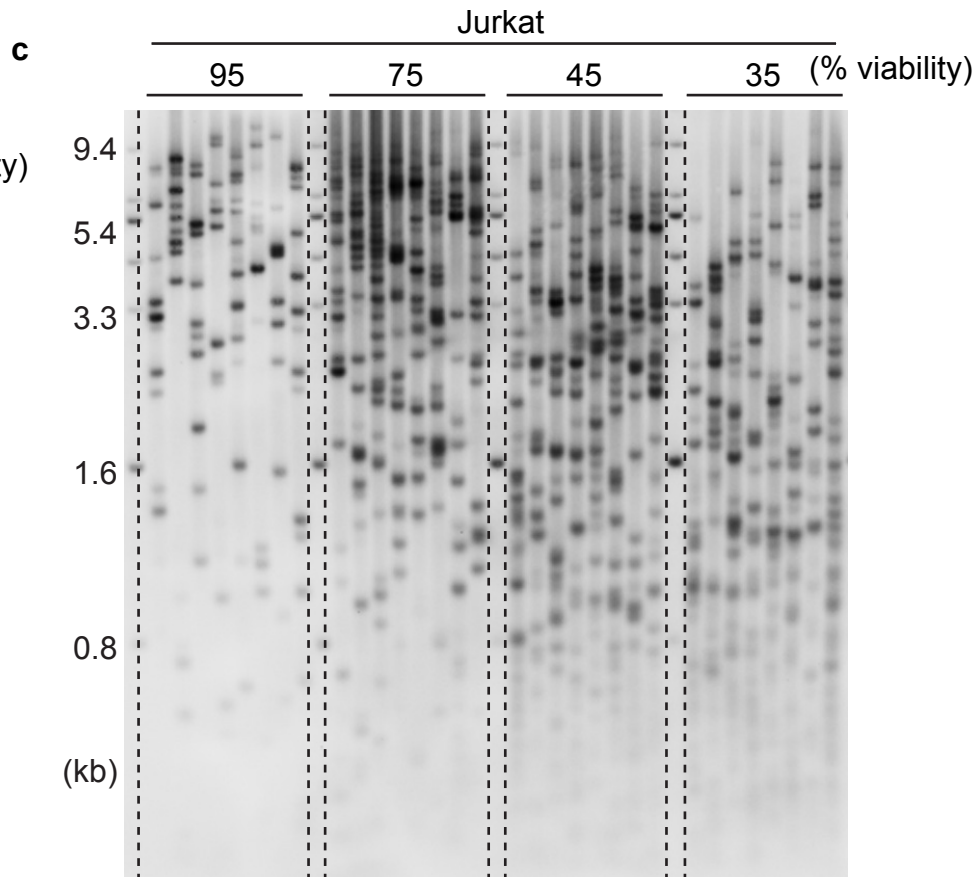

## **Supplementary Figure 2. Validation of TeSLA.**

(a) DNA from BJ cells was used to perform TeSLA; 1, positive control; 2, negative control without primers for PCR; 3, no TeSLA-Ts for ligations at telomere overhangs; 4, without digestion with REs; 5, no TeSLA adapters for ligations at genomic and subtelomeric DNA; 6, no ligase for any ligation reactions. (b) Same amount of genomic DNA (20 ng of each) from Jurkat cells with different viabilities was separated on 1% agarose gel to evaluate DNA integrity. (c) TeSLA of Jurkat cells with different percent viable cells.

**a**

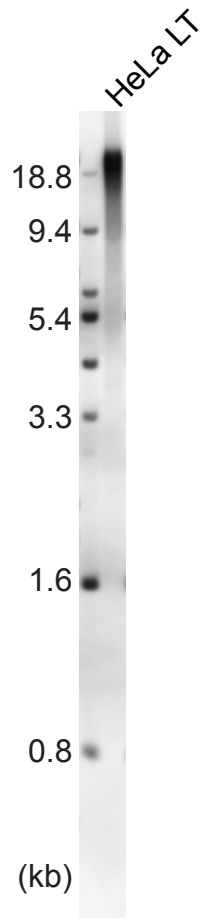

**b**

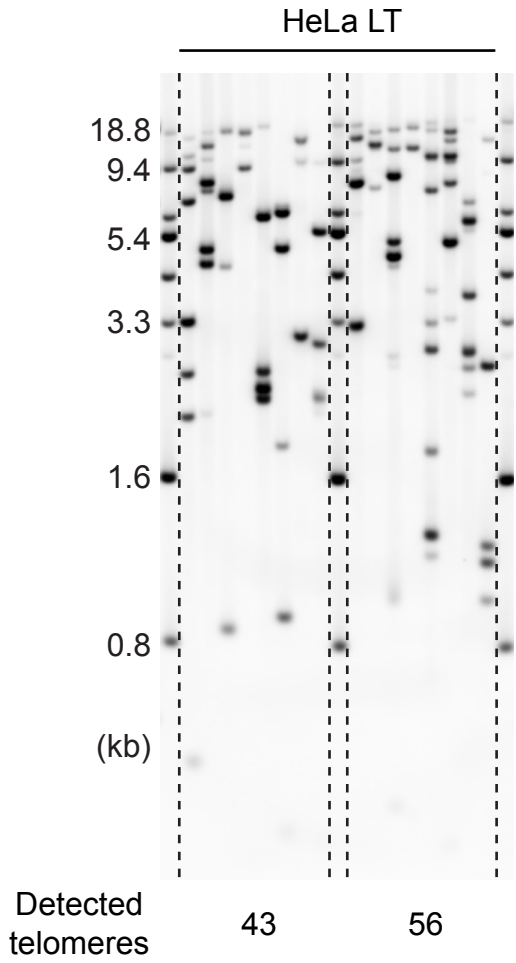

**c**

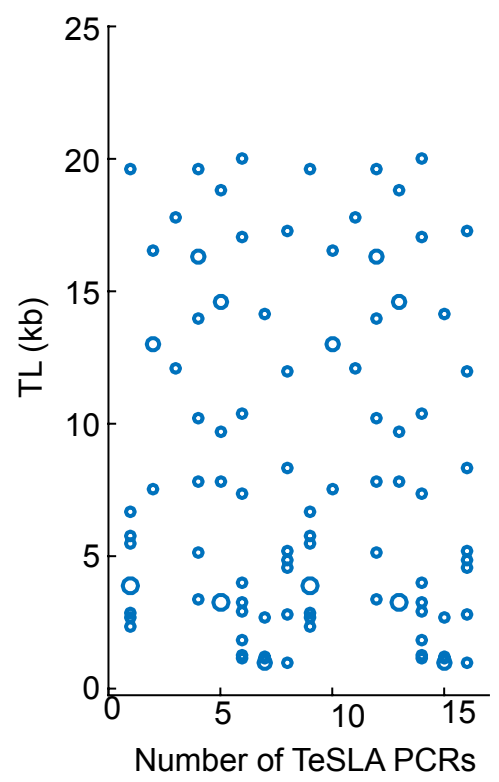

**Supplementary Figure 3. TLs of HeLa LT cells determined by TRF analysis and TeSLA.**

(a) TLs of HeLa LT cells determined by TRF analysis using the same restriction enzyme combination as TeSLA. (b) TeSLA results of HeLa LT (30 pg for each TeSLA PCR reaction, 16 reactions) demonstrated that the upper size limit of TeSLA for TL detection is around 18 kb. (c) The scatter plot represents distributions of TLs from TeSLA results (16 reactions) of HeLa LT cells. Each circle represents a particular TL that was detected by TeSLA. The circle size indicates single (small circle) or multiple (large circle) counts for a particular TL.

**a**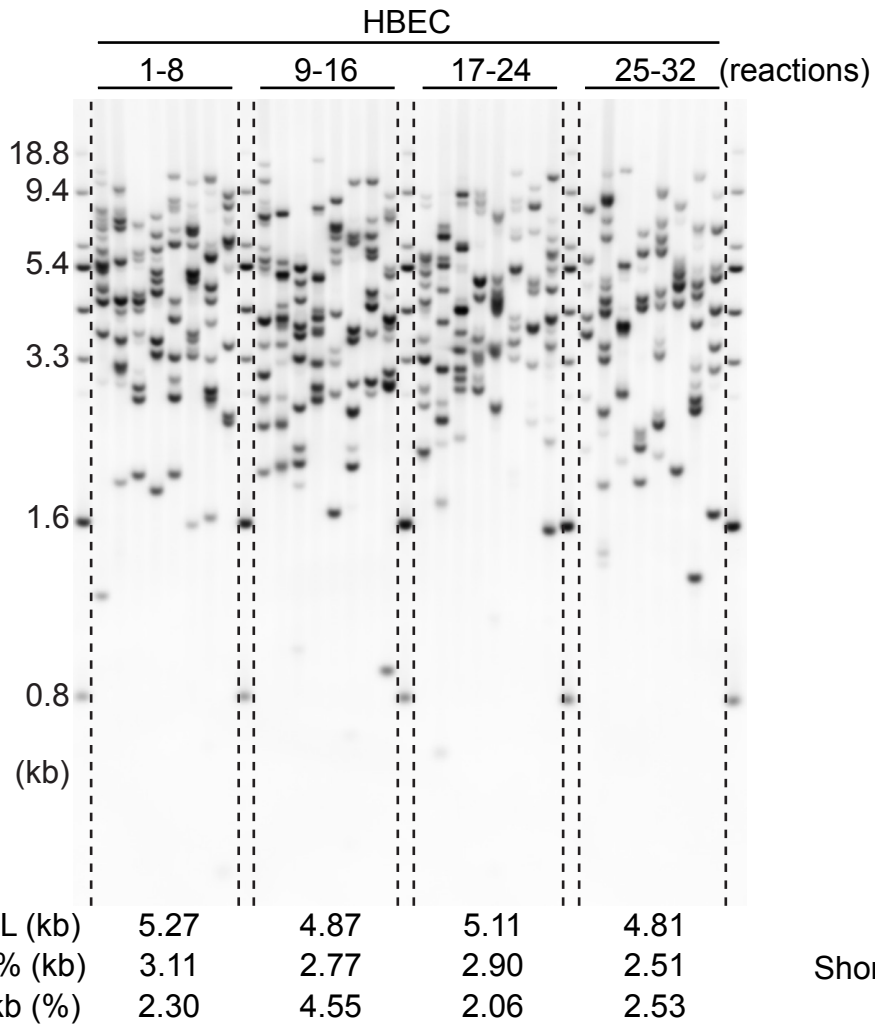**b**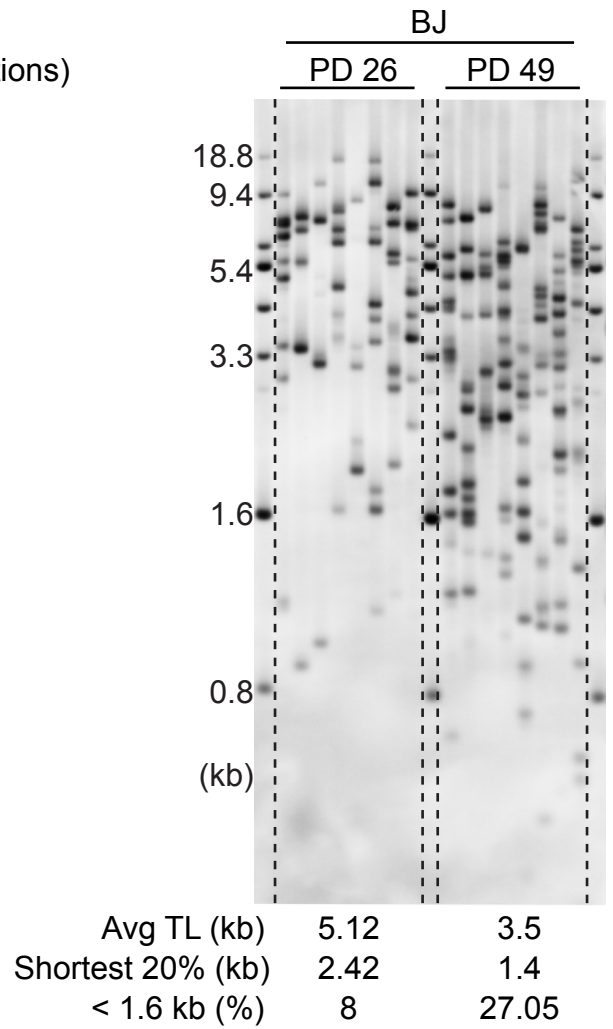

**Supplementary Figure 4. Intra-variation of TeSLA and TLs determined by TeSLA of BJ cells with different PDs.**

(a) TeSLA results of HBEC (30 pg for each TeSLA reaction, 32 reactions) to determine the intra-variation of TeSLA. (b) DNA extracted from different PDs (PD 26 and PD 49) of BJ cells were used to determine TL by TeSLA.



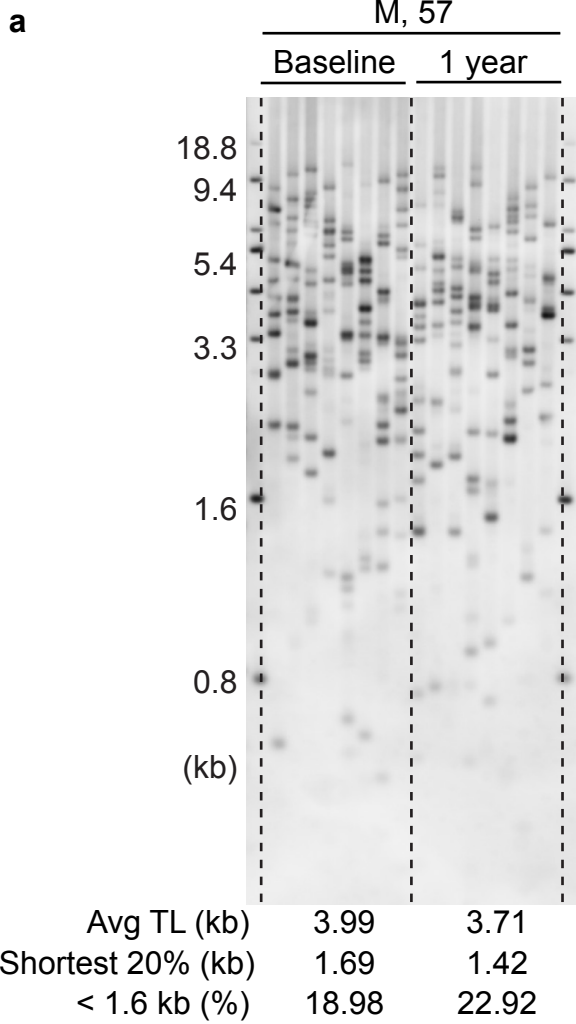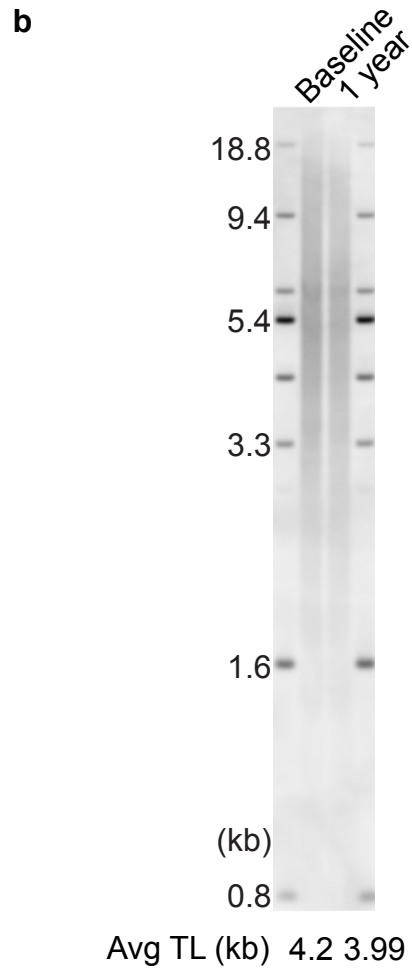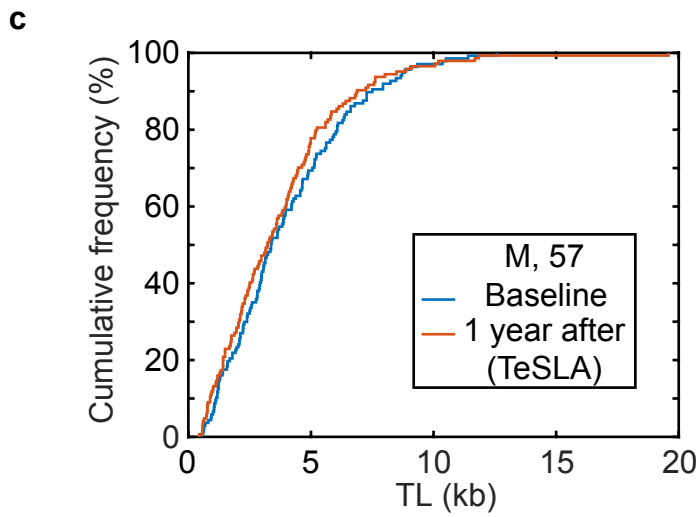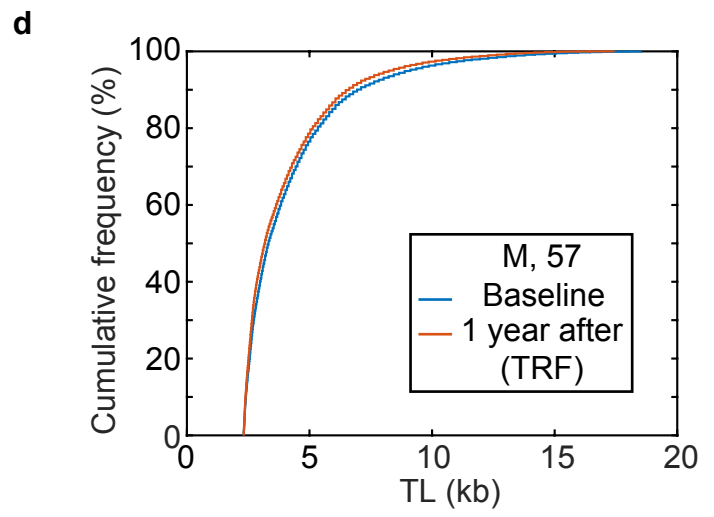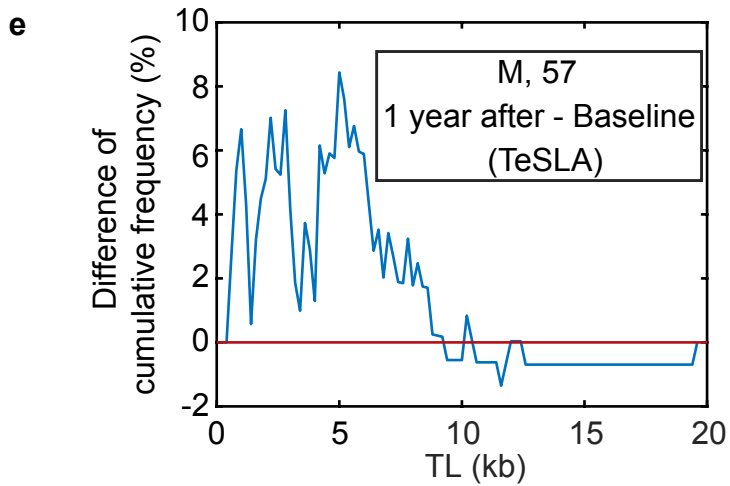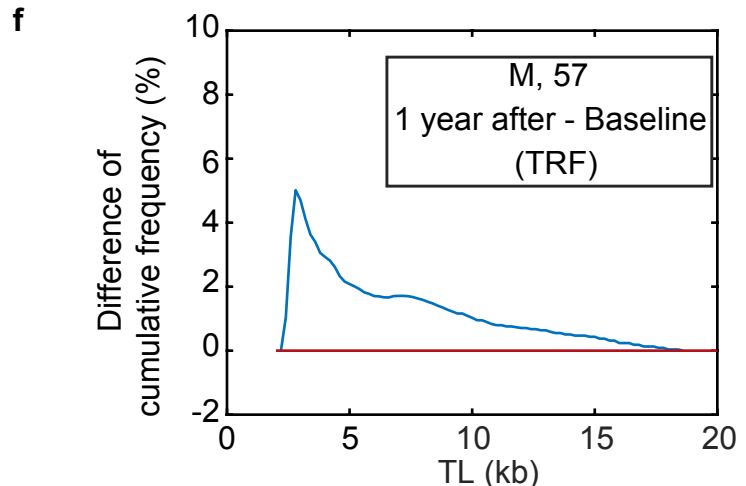

**Supplementary Figure 5. Using TeSLA and TRF analysis to determine changes of TLs for human longitudinally over a one year period.**

(a, b) TLs of DNA isolated from PBMCs from a healthy male at age 57 (baseline) and 1 year later were measured by TeSLA (a) and TRF analysis (b). (c, d) Empirical distribution curves based on TeSLA (c) and TRF analysis (d) results to represent TL distributions. The blue (red) lines are TL distributions at baseline (in 1 year after). The increase of cumulative frequency at a TL indicates the effect of TL shortening at the TL. (e, f) One-year differences in cumulative frequencies as a function of TLs describe one-year change in TL distribution by TeSLA (e) and TRF analysis (f).

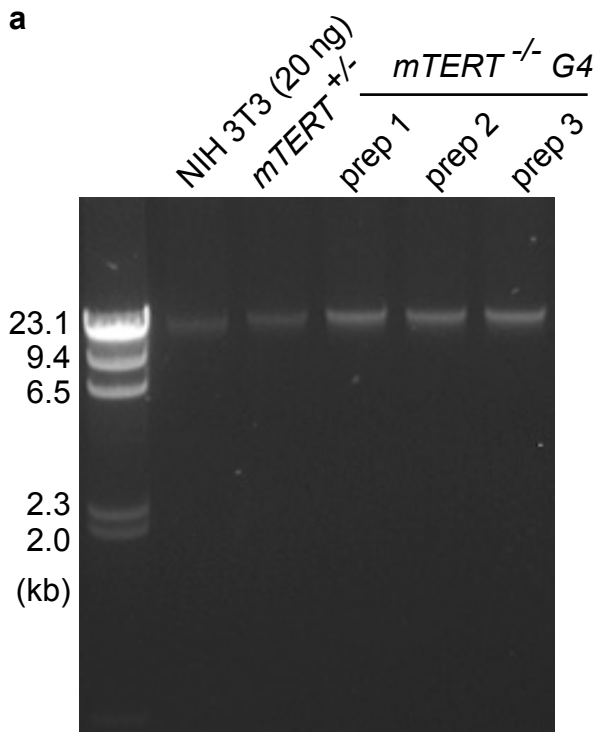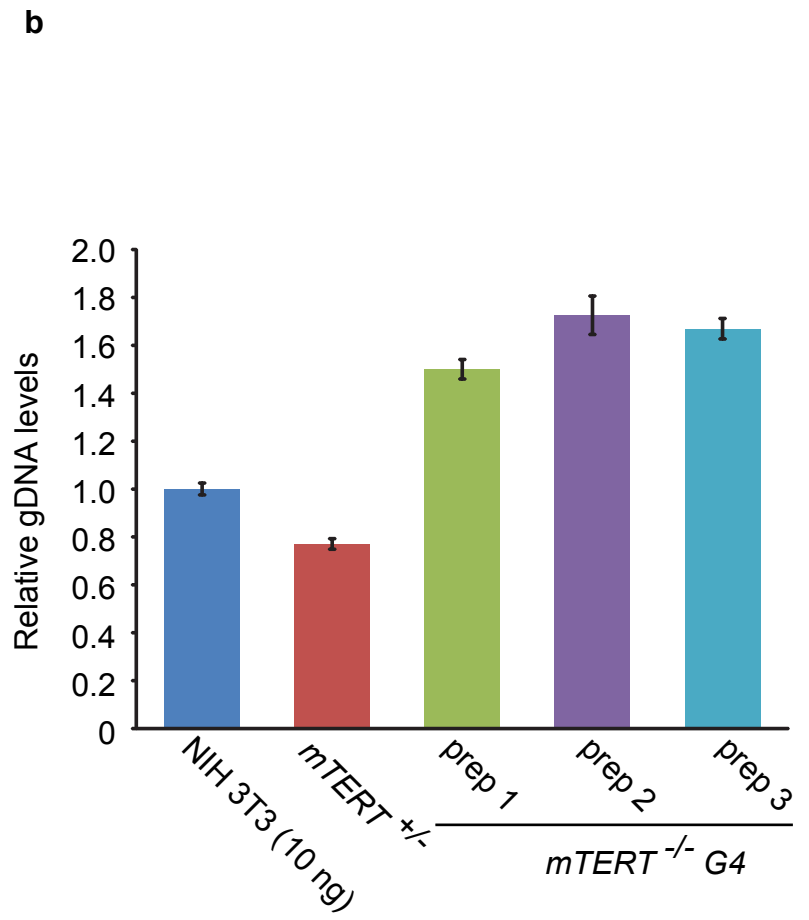

**Supplementary Figure 6. Quality control and q-PCR quantification of extracted DNA from *mTERT*<sup>+/-</sup> and *mTERT*<sup>-/-</sup>, G4 mice.**

(a) Extracted genomic DNA from *mTERT*<sup>+/-</sup> mouse liver tissue, and 3 individual DNA preps from the same *mTERT*<sup>-/-</sup> mouse liver tissue was separated on 1% agarose gel to evaluate DNA integrity. 20 ng of DNA from NIH 3T3 cells was served as a standard and positive control. (b) Relative DNA levels of *mTERT*<sup>+/-</sup> and *mTERT*<sup>-/-</sup> DNA compared with NIH 3T3. Relative DNA levels of each mouse DNA were calculated and normalized to 10 ng of genomic DNA from NIH3T3 cells by q-PCR to amplify mouse B1 repeats. After normalizing DNA concentrations of each sample, the same amount of DNA (50 ng of each) was used to perform TeSLA in **Fig. 7a**. (b; mean and s.e.m.,  $n = 3$ )

## Supplementary Table 1.

### Oligonucleotides used for TeSLA and mouse genomic DNA quantification.

| Oligos for TeSLA             | sequence                                                                                           |
|------------------------------|----------------------------------------------------------------------------------------------------|
| TeSLA-T1                     | 5'-ACT GGC CAC GTG TTT TGA TCG ACC CTA AC-3'                                                       |
| TeSLA-T2                     | 5'-ACT GGC CAC GTG TTT TGA TCG ATA ACC CT-3'                                                       |
| TeSLA-T3                     | 5'-ACT GGC CAC GTG TTT TGA TCG ACC TAA CC-3'                                                       |
| TeSLA-T4                     | 5'-ACT GGC CAC GTG TTT TGA TCG ACT AAC CC-3'                                                       |
| TeSLA-T5                     | 5'-ACT GGC CAC GTG TTT TGA TCG AAA CCC TA-3'                                                       |
| TeSLA-T6                     | 5'-ACT GGC CAC GTG TTT TGA TCG AAC CCT AA-3'                                                       |
| TeSLA adapter short          | 5'-GGT TAC TTT GTA AGC CTG TC[SpcC3]-3'                                                            |
| TeSLA adapter TA             | 5'-[Phos] TAG ACA GGC TTA CAA AGT AAC CAT GGT GGA<br>GAA TTC TGT CGT CTT CAC GCT ACA TT [SpcC3]-3' |
| TeSLA adapter AT             | 5'-[Phos] ATG ACA GGC TTA CAA AGT AAC CAT GGT GGA GAA<br>TTC TGT CGT CTT CAC GCT ACA TT [SpcC3]-3' |
| AP                           | 5'-TGT AGC GTG AAG ACG ACA GAA-3'                                                                  |
| TeSLA-TP                     | 5'-TGG CCA CGT GTT TTG ATC GA-3'                                                                   |
| Oligos for mouse genomic DNA | sequence                                                                                           |
| mB1F                         | 5'-CAG AGG CAG GCG GAT TT-3'                                                                       |
| mB1R                         | 5'-GAC AGG GTT TCT CTG TAG CC-3'                                                                   |

[Phos] represents 5' phosphorylation; [SpcC3] represents C3 spacer
